# Supplementary material
Source: PubMed Central journal article supplement (PMC1698892)
Supplement: 7601445s1.pdf [file 7601445s1.pdf]

**A**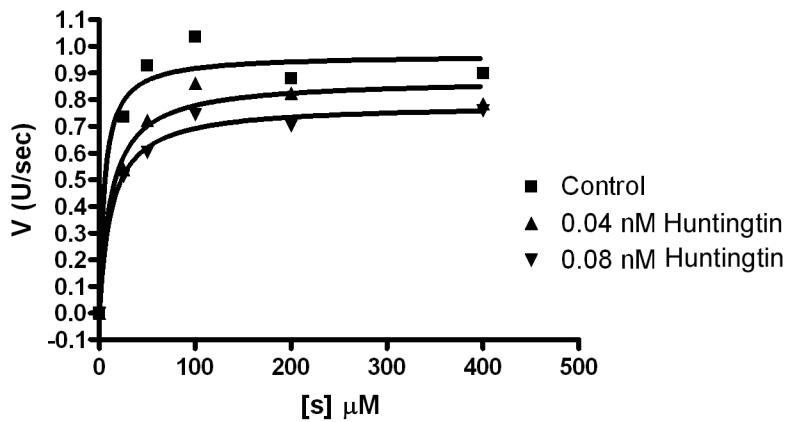**B**

|                  | Control | 0.04 nM | 0.08 nM |
|------------------|---------|---------|---------|
| Michaelis-Menten |         |         |         |
| Best-fit values  |         |         |         |
| VMAX             | 0.97    | 0.88    | 0.78    |
| KM               | 5.56    | 12.53   | 13.04   |
| Std. Error       |         |         |         |
| VMAX             | 0.062   | 0.048   | 0.026   |
| KM               | 4.05    | 4.47    | 2.74    |

**Fig. S1**

Figure S1. Concentration-dependent inhibition of caspase-3 by huntingtin. (A) Plot for the inhibitory effects of huntingtin on velocities ( $V$ ) of caspase-3 – catalyzed reactions at various concentrations of substrate, DEVD-AFC ( $[S]$ ). Recombinant Caspase-3 (Chemicon) was used in a final concentration of 0.391 nM. Huntingtin was generated by reticulocyte coupled transcription/translation system and dialyzed through 100 kDa Spectra/Por CE membranes (Spectrum Lab, Inc., CA) to reduce the amount of hemoglobin. Dialysates of reticulocyte extracts not expressing huntingtin were used as the controls (■). Due to the limited amount of protein from *in vitro* translated products and dialyze preparation, the highest concentration of huntingtin only reached 0.08 nM (▲). Huntingtin was pre-incubated with caspase-3 for 15 min before adding substrate and measured for 45 min at 37°C. As demonstrated using this fluorogenic assay, huntingtin inhibited caspase-3 activity (Figure S1A) in a concentration-dependent manner. In these experiments, huntingtin increased caspase-3 enzymatic  $K_m$  value and reduced  $V_{max}$  (Figure S1B). This data is representative of three independent experiments.
